# Supplementary material
Source: Springer Nature journal article supplement (https://www.springermedizin.de/resource/supplementary/13063_2014_2259_MOESM3_ESM.pdf/9621756)

PSI, Child Domin, means-scores

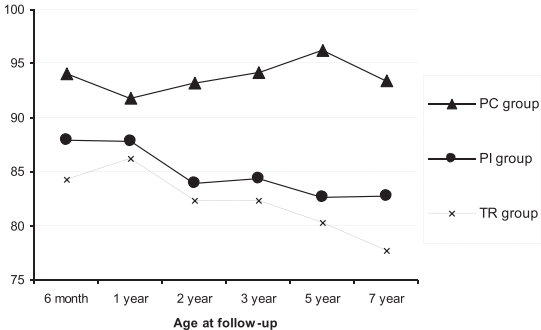

Supplement: MOESM3 [file 9621756]
